# Supplementary material for: Gains in QTL Detection Using an Ultra-High Density SNP Map Based on Population Sequencing Relative to Traditional RFLP/SSR Markers
Source: PLoS One. 2011 Mar 3;6(3):e17595. doi: 10.1371/journal.pone.0017595 (PMC3048400; doi:10.1371/journal.pone.0017595)
Supplement: Table S3 — QTLs identified for yield and yield-component traits in four trials from the RIL population of the Zhenshan 97/Minghui 63 cross using the RFLP/SSR genetic map. Trial 1, in 1997 from Xing et al [16] (Xing1997); Trial 2, in 1998 from Xing et al [16] (Xing1998); Trial 3, in 1998 from Hua et al [17]–[18] (Hua1998); Trial 4, in 1999 from Hua et al [17]–[18] (Hua1999). (XLS) [file pone.0017595.s005.xls]

## Sheet: qtl
	Table S3. QTLs identified for yield and yield-component traits in four trials from the RIL population of the Zhenshan 97/Minghui 63 cross using the RFLP/SSR genetic map. Trial 1, in 1997 from Xing et al [16] (Xing1997); Trial 2, in 1998 from Xing et al [16] (Xing1998); Trial 3, in 1998 from Hua et al [17-18] (Hua1998); Trial 4, in 1999 from Hua et al [17-18] (Hua1999).
	Trait	Trail	Closest Marker	Flanking markers	Chr.	LOD	Left (Mb)	Right (Mb)	Add	Var (%)
C2340	Yield/plant	2	C2340	C2340-C86	1	4.90231	34.47	37.71	1.32146	10.892
RM213			RM213	RM240-RM213	2	4.70116	31.5	34.65	1.04595	6.5793
C23401		3	C2340	C2340-C86	1	3.9916	34.47	37.71	1.77547	6.39993
c7.loc50		4	R1440	C1023-R1440	7	5.52912	7.23	16.87	2.51929	10.589
c1.loc170	Tillers/plant	1	RM212	G393-RM212	1	4.21655	31.05	33.05	0.182948	2.20067
C23402		2	C2340	RM212-C2340	1	4.04946	33.05	34.47	0.429533	7.16716
c7.loc48			R1440	C1023-R1440	7	4.85776	7.23	16.87	-0.412123	5.87631
c10.loc52		3	RM258	C677-RM258	10	5.9308	16.41	18.01	0.475	7.12391
c5.loc48		4	C734b	RM289-C734b	5	5.05352	7.81	15.63	0.408386	6.44574
c3.loc110	Grains/panicle	1	R19	RZ403-R19	3	13.5949	23.09	24.59	-6.96121	9.20595
c1.loc66		2	RG173	RM243-RG173	1	5.40318	7.97	9.25	4.88322	6.89608
RZ403			RZ403	RZ403-R19	3	13.3369	23.09	24.59	-7.75316	19.3721
c1.loc44		3	RM259	RG532-RM259	1	5.20252	5.76	7.45	5.2389	4.9589
c3.loc1101			R19	RZ403-R19	3	12.155	23.09	24.59	-4.38228	4.18582
c6.loc38			RM225	RM204-RM225	6	5.21614	3.17	3.42	-4.88132	3.67459
c7.loc501			R1440	C1023-R1440	7	6.50572	7.23	16.87	5.89084	6.97071
c1.loc441		4	RM259	RG532-RM259	1	4.85444	5.76	7.45	5.58712	5.24072
c3.loc1102			R19	RZ403-R19	3	8.60201	23.09	24.59	-5.04869	4.47666
c1.loc36	1000-grain weight	1	RG532	G359-RG532	1	7.06049	4.75	5.76	-0.695587	5.93043
RZ4031			RZ403	RZ403-R19	3	6.35631	23.09	24.59	0.913834	17.4225
c3.loc150			RM55	R321-RM55	3	5.8563	28.71	29.05	0.53496	5.73849
c5.loc20			RM289	RG360-RM289	5	6.76629	3.24	7.81	-0.578599	5.13539
c1.loc38		2	RG532	G359-RG532	1	7.08045	4.75	5.76	-0.745876	4.58972
c3.loc108			RZ403	C1087-RZ403	3	9.98422	21.08	23.09	1.14279	18.9912
c3.loc146			C944	C746-C944	3	5.24651	27.13	28.53	0.577747	4.8537
c5.loc201			RM289	RG360-RM289	5	8.62583	3.24	7.81	-0.689821	5.38259
c1.loc361		3	RG532	G359-RG532	1	7.65266	4.75	5.76	-0.710949	7.30408
RZ4032			RZ403	RZ403-R19	3	8.51448	23.09	24.59	0.994665	16.1547
c5.loc202			RM289	RG360-RM289	5	11.7811	3.24	7.81	-0.605179	5.99548
c9.loc166			RG570	RM242-RG570	9	6.1536	18.81	19.95	-0.610987	4.76423
c1.loc381		4	RG532	G359-RG532	1	6.95366	4.75	5.76	-0.731619	6.52062
c3.loc1081			RZ403	C1087-RZ403	3	10.6708	21.08	23.09	1.1046	18.9748
c5.loc203			RM289	RG360-RM289	5	8.07949	3.24	7.81	-0.649086	5.14061
c7.loc30			C1023	RG128-C1023	7	4.09783	2.32	7.23	0.573045	5.88998
c11.loc76			G257	G44-G257	11	4.30967	9.95	17.35	0.769604	6.99692
